# Supplementary material for: Similarity and dissimilarity in model-results between single andmultiple flow direction simulations based on a distributedecohydrological model
Source: Copernicus journal article supplement (doi:10.5194/hess-2018-47), 2018-02-19
Supplement: Supplementary file 1 [file hess-2018-47-supplement.pdf]

1

*[Hydrology and Earth System Sciences]*

2

Supplement for

3

**[Similarity and dissimilarity in model-results between single and multiple flow direction**

4

**simulations based on a distributed ecohydrological model]**

5

[Zhenwu Xu, and Guoping Tang]

6

[Department of Water Resources and Environment, School of Geography and Planning, Sun Yat-Sen University,

7

Guangzhou, Guangdong, 510275, China]

8

9

**Contents of this file**

10

**S1** Supporting information on evaluation of leaf area index and net primary productivity

11

**S2** Figures S1 to S4

12

**S3** Tables S1, S2

## 13 **S1 Supporting information**

### 14 S1.1 Evaluation on leaf area index and net primary productivity

15 Simulated annual mean leaf area index (LAI) in the shrub-dominated watershed  
16 Cleve Creek (Figure 5) averaged 0.29 to 0.31  $m^2/m^2$  and ranged from 0.19 to 0.45  
17  $m^2/m^2$  during 1991–2012 under four algorithms (Table S2), closing to reported data  
18 for similar ecosystems. White et al. (2000) indicated that LAI in shrublands in arid  
19 ecosystems averaged 0.22  $m^2/m^2$  and ranged from 0.21 to 1.09  $m^2/m^2$ . Gibbens et  
20 al. (1996) indicated that LAI in shrub communities typically ranged from 0.3 to 0.4  
21  $m^2/m^2$  in the southwestern USA. The point–intercept–measured LAI for sagebrush–  
22 steppe ecosystems in the western USA averaged 0.33  $m^2/m^2$  (Finzel et al., 2012). The  
23 simulated net primary productivity (NPP) in the study area averaged 138 to 145  $gC/m^2$   
24 per year and ranged from 94 to 213  $gC/m^2$  per year during 1991–2012, also falling  
25 within the ranges of reported data in similar ecosystems. Tian et al. (2010) indicated  
26 that NPP in shrublands in the southern USA ranged from 0 to 300  $gC/m^2$  per year.  
27 Spatially, LAI and NPP were simulated to be greater in valleys and lower in the ridges  
28 of the watershed (Fig. 5), largely as a result of differences in annual mean soil moisture  
29 across the watershed (higher in valleys and lower in the ridges, Fig. 3). In addition,  
30 simulated LAI and NPP were lowest (zero) for bare ground, lower for shrubs/grasses  
31 and higher for conifers. These agreements and patterns indicated that HESS captured  
32 well the spatial and temporal patterns of vegetation in the study area (e.g. Fig. S3)

33 **S2 Figures**

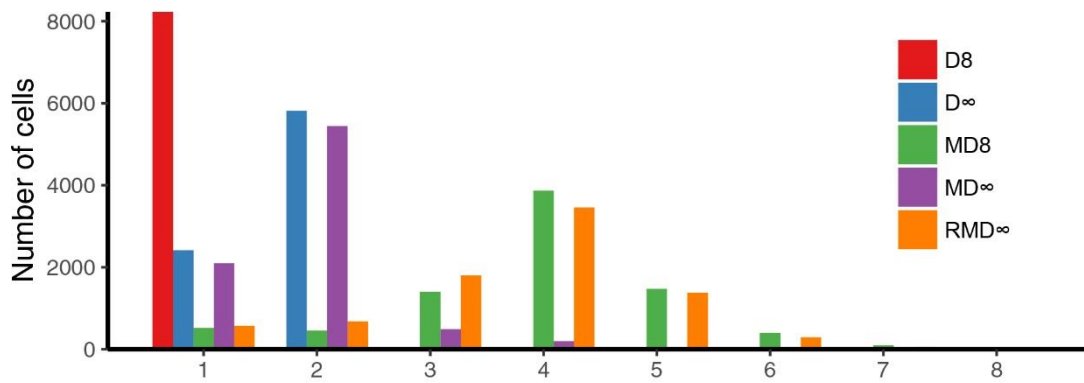

34

35 **Figure S1.** The total number of cells where flow is routed to from 1 to 8 downslope  
 36 neighbors. The digits in x-axis refers to the number of downslope neighbors receiving  
 37 water from a center cell.

38

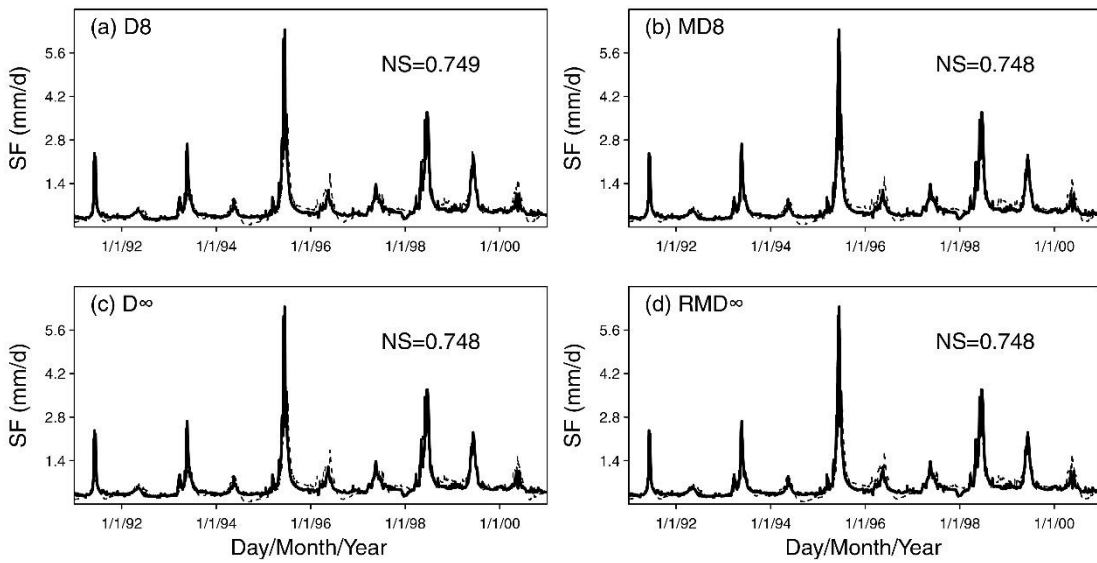

39

40 **Figure S2.** Model's results under four algorithms in calibration of simulated daily  
 41 streamflow (SF) (dashed line) against observed data (solid line). NS is short for Nash-  
 42 Sutcliff coefficient.

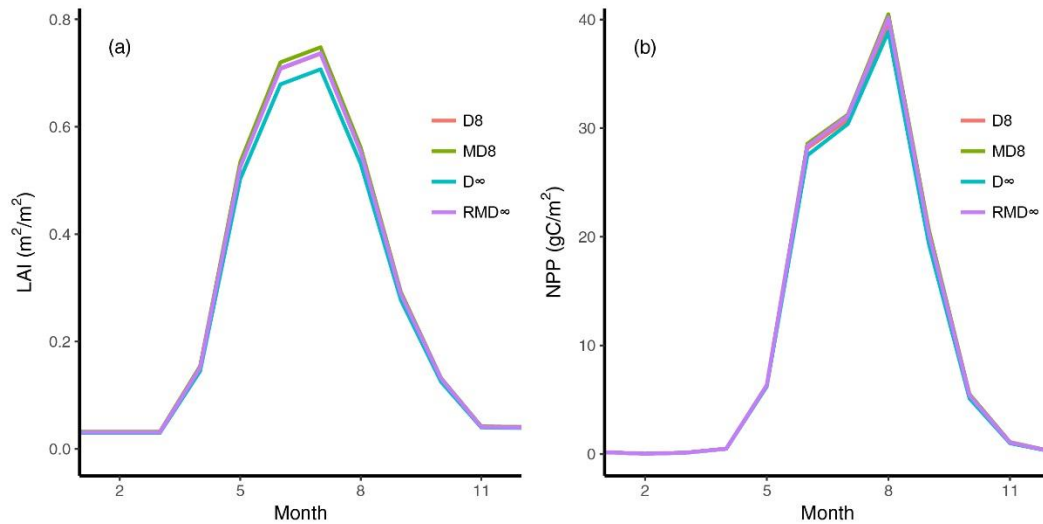

43

44 **Figure S3** The variation of HESS's simulated monthly mean LAI ( $m^2/m^2$ ) and NPP  
 45 ( $gC/m^2$ ) in a typical year 2005 under four algorithms for the Cleve Creek watershed.

46

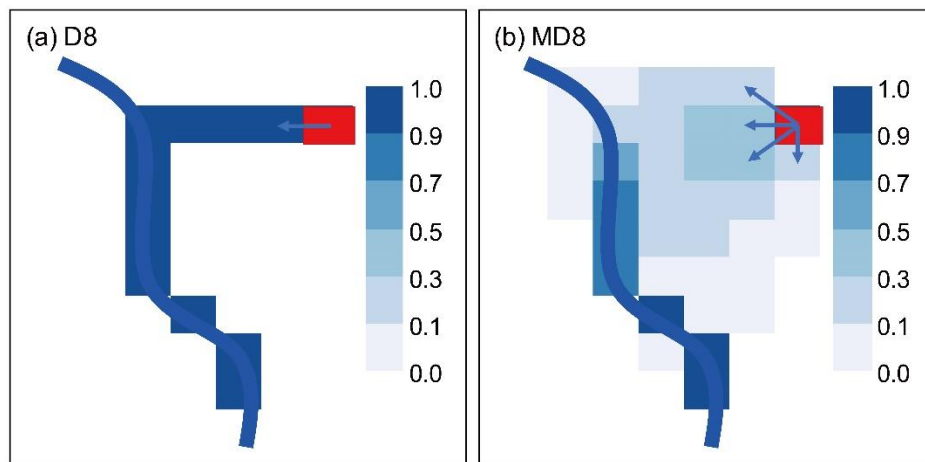

47

48 **Figure S4.** The flow distribution from a typical individual cell (red rectangle with a  
 49 distance to stream of 400 m) to stream between D8 and MD8 algorithm at cell level.  
 50 Clearly, flow is in only one direction under D8 while it is distributed more than one cell  
 51 and in multiple directions under MD8. As a result, the dispersion of flow at cell level is  
 52 greater under MD8 than that under D8. Differences in flow distribution also result in  
 53 the accumulated area of flow differ among cells.

54 **S3 Tables**55 **Table S1.** Calibration and evaluation of HESS's simulated flow on an annual series

| Year        | SF (mm/day) |      |      |            |              |              | NS    |       |            |              |              |
|-------------|-------------|------|------|------------|--------------|--------------|-------|-------|------------|--------------|--------------|
|             | Observed    | D8   | MD8  | D $\infty$ | RMD $\infty$ | SF- $\sigma$ | D8    | MD8   | D $\infty$ | RMD $\infty$ | NS- $\sigma$ |
| 1991        | 0.44        | 0.30 | 0.31 | 0.30       | 0.30         | 0.00         | 0.46  | 0.45  | 0.46       | 0.45         | 0.01         |
| <u>1992</u> | 0.32        | 0.35 | 0.35 | 0.35       | 0.35         | <u>0.00</u>  | 0.93  | 0.93  | 0.92       | 0.93         | <u>0.00</u>  |
| 1993        | 0.57        | 0.48 | 0.47 | 0.48       | 0.47         | 0.00         | 0.53  | 0.51  | 0.53       | 0.52         | 0.01         |
| 1994        | 0.38        | 0.33 | 0.34 | 0.34       | 0.34         | 0.00         | 0.53  | 0.56  | 0.52       | 0.55         | 0.02         |
| 1995        | 0.99        | 1.02 | 1.00 | 1.03       | 1.01         | 0.01         | 0.82  | 0.83  | 0.82       | 0.83         | 0.00         |
| 1996        | 0.51        | 0.58 | 0.59 | 0.58       | 0.58         | 0.00         | -0.66 | -0.61 | -0.72      | -0.67        | 0.04         |
| 1997        | 0.57        | 0.58 | 0.59 | 0.59       | 0.59         | 0.00         | 0.62  | 0.62  | 0.61       | 0.62         | 0.00         |
| 1998        | 0.94        | 1.01 | 0.99 | 1.01       | 1.00         | 0.01         | 0.84  | 0.83  | 0.84       | 0.84         | 0.01         |
| 1999        | 0.74        | 0.78 | 0.77 | 0.77       | 0.77         | 0.00         | 0.89  | 0.87  | 0.89       | 0.88         | 0.01         |
| 2000        | 0.51        | 0.54 | 0.55 | 0.53       | 0.55         | 0.01         | -1.17 | -1.04 | -1.08      | -1.10        | 0.05         |
| 2001        | 0.53        | 0.38 | 0.39 | 0.38       | 0.39         | 0.01         | 0.87  | 0.88  | 0.87       | 0.87         | 0.00         |
| 2002        | 0.38        | 0.23 | 0.24 | 0.22       | 0.23         | 0.01         | 0.92  | 0.93  | 0.92       | 0.92         | 0.00         |
| 2003        | 0.43        | 0.22 | 0.24 | 0.22       | 0.23         | 0.01         | 0.83  | 0.84  | 0.83       | 0.84         | 0.01         |
| 2004        | 0.40        | 0.39 | 0.40 | 0.39       | 0.39         | 0.00         | 0.97  | 0.97  | 0.97       | 0.97         | 0.00         |
| <u>2005</u> | 1.35        | 1.15 | 1.12 | 1.17       | 1.14         | <u>0.02</u>  | 0.84  | 0.85  | 0.85       | 0.86         | <u>0.00</u>  |
| 2006        | 0.81        | 0.61 | 0.62 | 0.62       | 0.62         | 0.00         | 0.84  | 0.83  | 0.85       | 0.84         | 0.00         |
| 2007        | 0.45        | 0.43 | 0.44 | 0.43       | 0.44         | 0.00         | 0.86  | 0.87  | 0.86       | 0.86         | 0.00         |
| 2008        | 0.38        | 0.33 | 0.34 | 0.33       | 0.34         | 0.00         | 0.92  | 0.93  | 0.92       | 0.93         | 0.00         |
| 2009        | 0.48        | 0.58 | 0.57 | 0.58       | 0.57         | 0.01         | 0.90  | 0.92  | 0.90       | 0.91         | 0.01         |
| 2010        | 0.58        | 0.54 | 0.53 | 0.54       | 0.53         | 0.00         | 0.83  | 0.82  | 0.83       | 0.82         | 0.01         |
| 2011        | 1.30        | 0.98 | 0.95 | 0.98       | 0.96         | 0.01         | 0.76  | 0.74  | 0.77       | 0.75         | 0.01         |
| 2012        | 0.45        | 0.42 | 0.43 | 0.42       | 0.42         | 0.00         | 0.88  | 0.88  | 0.87       | 0.88         | 0.00         |

56 \*SF is short for observed streamflow; NS is is short for the Nash-Sutcliff coefficient;

57 SF- $\sigma$  is standard deviation of simulated streamflow under four algorithms; NS- $\sigma$  is

58 standard deviation of NS under four algorithms.

59

60 **Table S2.** Statistics of HESS's simulated LAI and NPP per year during 1991-2012.

|              | Leaf area index ( $m^2/m^2$ ) |      |      |          | Net primary productivity ( $gC/m^2$ ) |     |     |          |
|--------------|-------------------------------|------|------|----------|---------------------------------------|-----|-----|----------|
|              | Mean                          | Min  | Max  | $\sigma$ | Mean                                  | Min | Max | $\sigma$ |
| D8           | 0.29                          | 0.20 | 0.44 | 0.059    | 141                                   | 208 | 99  | 30.6     |
| MD8          | 0.31                          | 0.20 | 0.45 | 0.063    | 145                                   | 213 | 102 | 31.5     |
| D $\infty$   | 0.29                          | 0.19 | 0.43 | 0.060    | 138                                   | 207 | 94  | 31.2     |
| RMD $\infty$ | 0.30                          | 0.20 | 0.44 | 0.063    | 143                                   | 212 | 100 | 31.5     |

61 \* $\sigma$  is standard deviation of annual data.

63 **References**

- 64 Finzel, J. A., Seyfried, M. S., Weltz, M. A., Kiniry, J. R., Johnson, M.-V. V., and  
65 Launchbaugh, K. L.: Indirect Measurement of Leaf Area Index in Sagebrush-  
66 Steppe Rangelands, *Rangeland Ecology & Management*, 65, 208-212,  
67 10.2111/rem-d-11-00069.1, 2012.
- 68 Gibbens, R. P., Hicks, R. A., and Dugas, W. A.: Structure and function of C-3 and C-  
69 4 Chihuahuan Desert plant communities. Standing crop and leaf area index,  
70 *Journal of Arid Environments*, 34, 47-62, 10.1006/jare.1996.0092, 1996.
- 71 Tian, H., Chen, G., Liu, M., Zhang, C., Sun, G., Lu, C., Xu, X., Ren, W., Pan, S., and  
72 Chappelka, A.: Model estimates of net primary productivity,  
73 evapotranspiration, and water use efficiency in the terrestrial ecosystems of the  
74 southern United States during 1895-2007, *Forest Ecology and Management*,  
75 259, 1311-1327, 10.1016/j.foreco.2009.10.009, 2010.
- 76 White, M. A., Asner, G. P., Nemani, R. R., Privette, J. L., and Running, S. W.:  
77 Measuring fractional cover and leaf area index in arid ecosystems: Digital  
78 camera, radiation transmittance, and laser altimetry methods, *Remote Sensing  
79 of Environment*, 74, 45-57, 10.1016/s0034-4257(00)00119-x, 2000.
- 80
