# Supplementary material for: Similarity and dissimilarity in model-results between single andmultiple flow direction simulations based on a distributedecohydrological model
Source: Copernicus journal article supplement (doi:10.5194/hess-2018-47), 2018-02-19
Supplement: Supplementary file [file hess-2018-47-AC1-supplement.pdf]

**Table 1.** Calibration and evaluation of model simulations under the four routing algorithms

| Algorithms              |       |    | D8    | MD8   | D $\infty$ | RMD $\infty$ | MFD-md | $\sigma$ |
|-------------------------|-------|----|-------|-------|------------|--------------|--------|----------|
| Outlet flow<br>(mm/day) | 91-00 | SF | 0.596 | 0.596 | 0.596      | 0.596        | 0.596  | 0.000    |
|                         |       | BF | 0.585 | 0.588 | 0.587      | 0.588        | 0.589  | 0.001    |
|                         | 01-12 | SF | 0.522 | 0.522 | 0.524      | 0.522        | 0.516  | 0.003    |
|                         |       | BF | 0.508 | 0.522 | 0.511      | 0.521        | 0.507  | 0.007    |
| RMSE<br>(mm/day)        | 91-00 | SF | 0.270 | 0.271 | 0.271      | 0.271        | 0.274  | 0.001    |
|                         |       | BF | 0.230 | 0.228 | 0.233      | 0.230        | 0.232  | 0.002    |
|                         | 01-12 | SF | 0.326 | 0.329 | 0.327      | 0.326        | 0.331  | 0.002    |
|                         |       | BF | 0.284 | 0.282 | 0.282      | 0.281        | 0.283  | 0.001    |
| NS                      | 91-00 | SF | 0.749 | 0.748 | 0.748      | 0.748        | 0.742  | 0.003    |
|                         |       | BF | 0.746 | 0.751 | 0.740      | 0.746        | 0.741  | 0.004    |
|                         | 01-12 | SF | 0.812 | 0.808 | 0.811      | 0.811        | 0.806  | 0.002    |
|                         |       | BF | 0.823 | 0.826 | 0.826      | 0.827        | 0.824  | 0.001    |

\* $\sigma$  is standard deviation; RMSE is short for root mean squared error; NS is short for Nash-Sutcliffe coefficient; “91-00” and “01-12” represent the calibration period 1991-2000 and the evaluation period 2001-2012, respectively; SF is streamflow; BF is baseflow.

**Table 2.** Calibration and evaluation of HESS’s simulated flow on an annual series

| Year | SF (mm/day) |      |      |            |              |        |              | NS    |       |            |              |        |              |
|------|-------------|------|------|------------|--------------|--------|--------------|-------|-------|------------|--------------|--------|--------------|
|      | Observed    | D8   | MD8  | D $\infty$ | RMD $\infty$ | MFD-md | SF- $\sigma$ | D8    | MD8   | D $\infty$ | RMD $\infty$ | MFD-md | NS- $\sigma$ |
| 1991 | 0.44        | 0.30 | 0.31 | 0.30       | 0.30         | 0.29   | 0.00         | 0.46  | 0.45  | 0.46       | 0.45         | 0.42   | 0.02         |
| 1992 | 0.32        | 0.35 | 0.35 | 0.35       | 0.35         | 0.34   | 0.00         | 0.93  | 0.93  | 0.92       | 0.93         | 0.93   | 0.00         |
| 1993 | 0.57        | 0.48 | 0.47 | 0.48       | 0.47         | 0.47   | 0.00         | 0.53  | 0.51  | 0.53       | 0.52         | 0.50   | 0.01         |
| 1994 | 0.38        | 0.33 | 0.34 | 0.34       | 0.34         | 0.34   | 0.00         | 0.53  | 0.56  | 0.52       | 0.55         | 0.56   | 0.02         |
| 1995 | 0.99        | 1.02 | 1.00 | 1.03       | 1.01         | 0.99   | 0.01         | 0.82  | 0.83  | 0.82       | 0.83         | 0.82   | 0.00         |
| 1996 | 0.51        | 0.58 | 0.59 | 0.58       | 0.58         | 0.59   | 0.01         | -0.66 | -0.61 | -0.72      | -0.67        | -0.70  | 0.04         |
| 1997 | 0.57        | 0.58 | 0.59 | 0.59       | 0.59         | 0.59   | 0.00         | 0.62  | 0.62  | 0.61       | 0.62         | 0.62   | 0.00         |
| 1998 | 0.94        | 1.01 | 0.99 | 1.01       | 1.00         | 0.99   | 0.01         | 0.84  | 0.83  | 0.84       | 0.84         | 0.84   | 0.01         |
| 1999 | 0.74        | 0.78 | 0.77 | 0.77       | 0.77         | 0.78   | 0.00         | 0.89  | 0.87  | 0.89       | 0.88         | 0.88   | 0.01         |
| 2000 | 0.51        | 0.54 | 0.55 | 0.53       | 0.55         | 0.56   | 0.01         | -1.17 | -1.04 | -1.08      | -1.10        | -1.25  | 0.08         |
| 2001 | 0.53        | 0.38 | 0.39 | 0.38       | 0.39         | 0.39   | 0.01         | 0.87  | 0.88  | 0.87       | 0.87         | 0.88   | 0.00         |
| 2002 | 0.38        | 0.23 | 0.24 | 0.22       | 0.23         | 0.23   | 0.01         | 0.92  | 0.93  | 0.92       | 0.92         | 0.93   | 0.00         |
| 2003 | 0.43        | 0.22 | 0.24 | 0.22       | 0.23         | 0.23   | 0.01         | 0.83  | 0.84  | 0.83       | 0.84         | 0.83   | 0.01         |
| 2004 | 0.40        | 0.39 | 0.40 | 0.39       | 0.39         | 0.38   | 0.01         | 0.97  | 0.97  | 0.97       | 0.97         | 0.98   | 0.00         |
| 2005 | 1.35        | 1.15 | 1.12 | 1.17       | 1.14         | 1.11   | 0.02         | 0.84  | 0.85  | 0.85       | 0.86         | 0.84   | 0.01         |
| 2006 | 0.81        | 0.61 | 0.62 | 0.62       | 0.62         | 0.62   | 0.00         | 0.84  | 0.83  | 0.85       | 0.84         | 0.83   | 0.00         |
| 2007 | 0.45        | 0.43 | 0.44 | 0.43       | 0.44         | 0.44   | 0.00         | 0.86  | 0.87  | 0.86       | 0.86         | 0.87   | 0.00         |
| 2008 | 0.38        | 0.33 | 0.34 | 0.33       | 0.34         | 0.33   | 0.00         | 0.92  | 0.93  | 0.92       | 0.93         | 0.93   | 0.00         |
| 2009 | 0.48        | 0.58 | 0.57 | 0.58       | 0.57         | 0.56   | 0.01         | 0.90  | 0.92  | 0.90       | 0.91         | 0.92   | 0.01         |
| 2010 | 0.58        | 0.54 | 0.53 | 0.54       | 0.53         | 0.52   | 0.01         | 0.83  | 0.82  | 0.83       | 0.82         | 0.82   | 0.01         |
| 2011 | 1.30        | 0.98 | 0.95 | 0.98       | 0.96         | 0.94   | 0.01         | 0.76  | 0.74  | 0.77       | 0.75         | 0.73   | 0.01         |
| 2012 | 0.45        | 0.42 | 0.43 | 0.42       | 0.42         | 0.43   | 0.00         | 0.88  | 0.88  | 0.87       | 0.88         | 0.88   | 0.00         |

\*SF is short for observed streamflow; NS is short for the Nash-Sutcliffe coefficient; SF- $\sigma$  is standard deviation of simulated streamflow under four algorithms; NS- $\sigma$  is standard deviation of NS under four algorithms.

**Table 3.** Comparisons of modeled soil saturation deficit and leaf area index among the four routing algorithms averaged for the watershed

|          | Soil saturation deficit (m) |       |            |              |        | Leaf area index ( $m^2m^{-2}$ ) |       |            |              |        |
|----------|-----------------------------|-------|------------|--------------|--------|---------------------------------|-------|------------|--------------|--------|
|          | D8                          | MD8   | D $\infty$ | RMD $\infty$ | MFD-md | D8                              | MD8   | D $\infty$ | RMD $\infty$ | MFD-md |
| Min      | 0.046                       | 0.026 | 0.038      | 0.027        | 0.019  | 0.000                           | 0.000 | 0.000      | 0.000        | 0.000  |
| Max      | 1.857                       | 1.906 | 1.842      | 1.880        | 1.883  | 1.252                           | 1.253 | 1.254      | 1.256        | 1.253  |
| Mean     | 1.379                       | 1.375 | 1.382      | 1.376        | 1.360  | 0.271                           | 0.278 | 0.263      | 0.274        | 0.288  |
| $\sigma$ | 0.298                       | 0.299 | 0.292      | 0.293        | 0.290  | 0.249                           | 0.252 | 0.239      | 0.246        | 0.256  |

\*Statistics are calculated based on annual mean daily values averaged for the watershed for the study period.

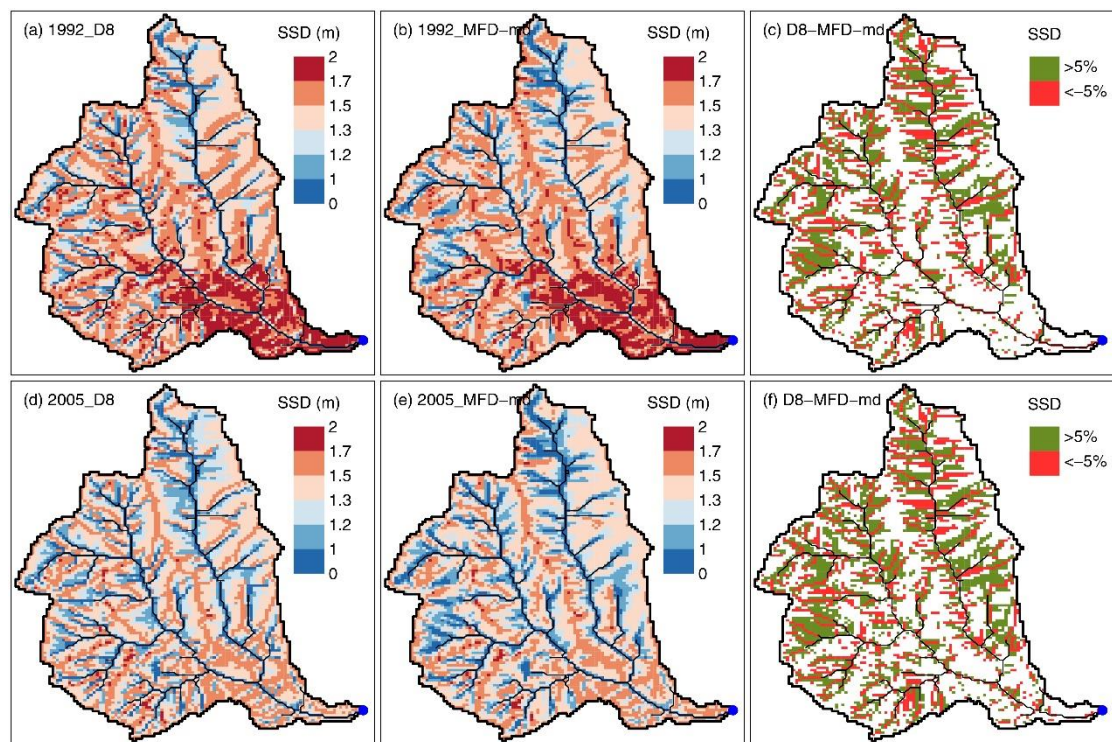

**Figure 1.** The spatial patterns of simulated soil saturation deficit (SSD) under (a, d) D8 and (b, e) MFD-md algorithm; (c, f) the spatial pattern of differences in SSD between D8 and MFD-md algorithm.

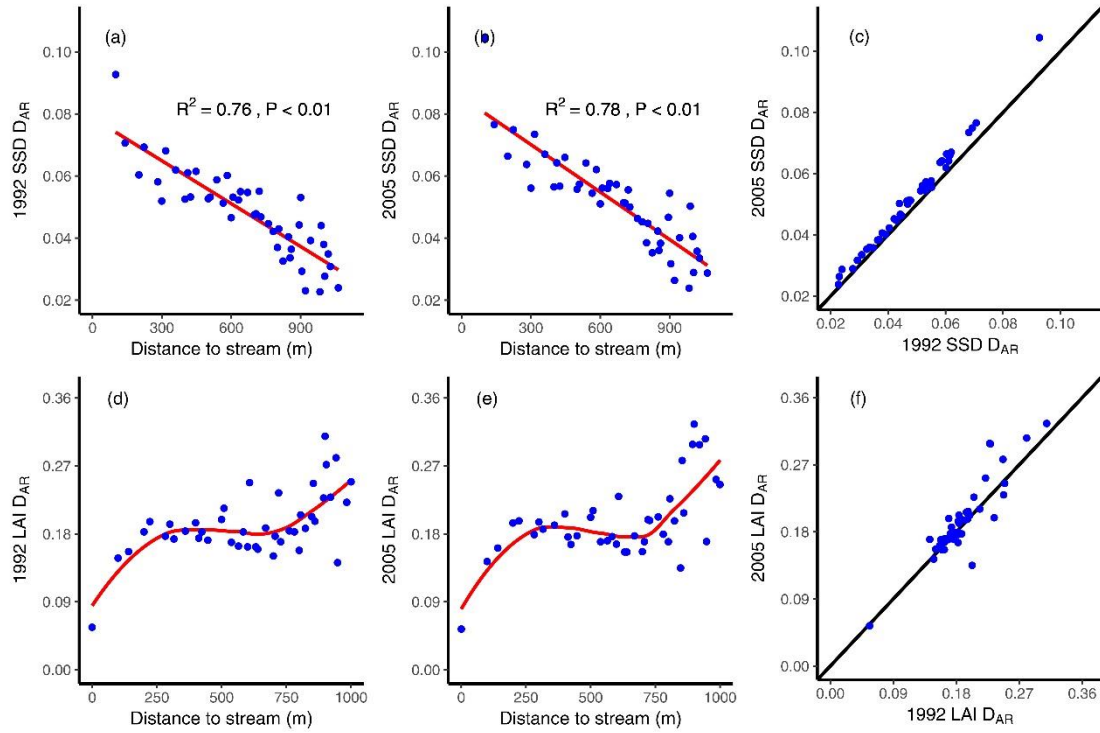

**Figure 2.** Changes in the average relative deviation ( $D_{AR}$ ) of soil water saturation deficit (SSD) and leaf area index (LAI) as distances from channel increase under D8 and MFD-md algorithm for the 1992-dry and 2005-wet year.

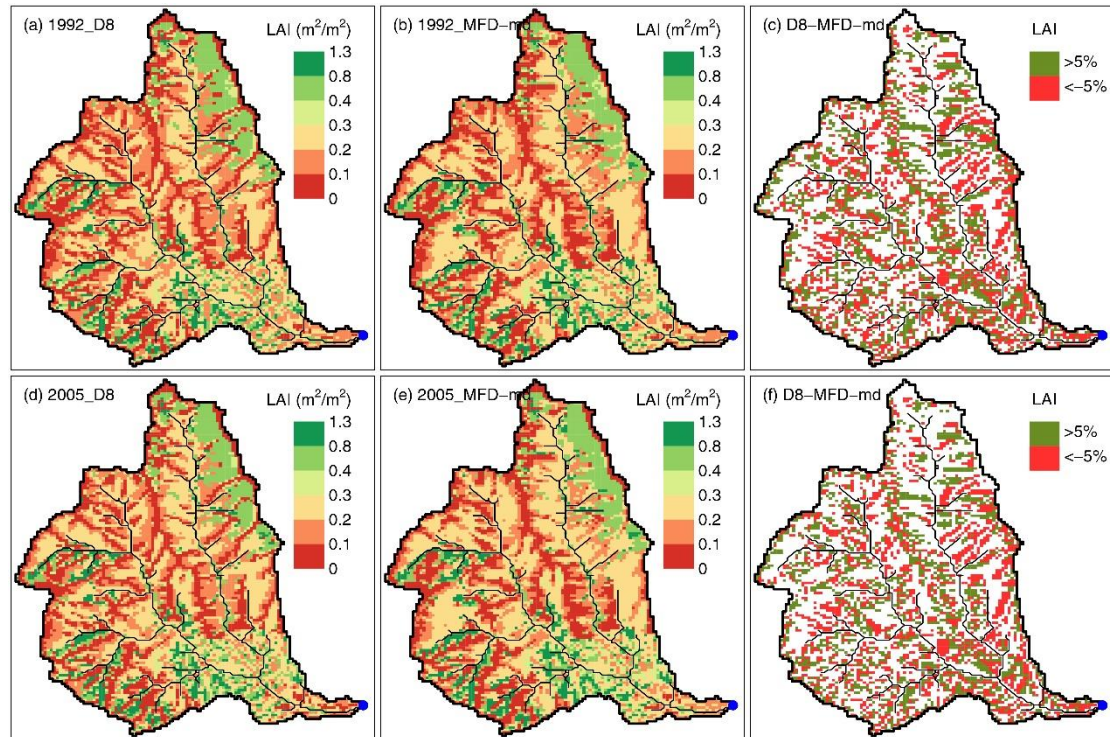

**Figure 3.** The spatial patterns of simulated leaf area index (LAI) under (a, d) D8 and (b, e) MFD-md algorithm; (c, f) the spatial pattern of differences in LAI between D8 and MFD-md algorithm.
